# Supplementary material
Source: publisher figshare collection journal article supplement (https://sage.figshare.com/ndownloader/files/13380683)
Supplement: Supplementary file 1 [file 13380683]

Supplementary Table 1. Checklist based on O'Brien et al's (2014) Standards for Reporting Qualitative Research

| Item | Title & Abstract                            | Detail (from O'Brien et al)                                                                                                     | Comment on Study                                                                 |
|------|---------------------------------------------|---------------------------------------------------------------------------------------------------------------------------------|----------------------------------------------------------------------------------|
| S1   | Title                                       | Describes the nature/topic of the study. Identifies approach or methods used                                                    | Yes: Study identified as thematic synthesis in the title on page 1               |
| S2   | Abstract                                    | Summary of the study as required by target publication                                                                          | Yes on page 1                                                                    |
|      | <b>Introduction</b>                         |                                                                                                                                 |                                                                                  |
| S3   | Problem formulation                         | Description and significance of the problem/phenomenon studied; review of relevant theory and empirical work; problem statement | Yes: Presented in Introduction on page 1 and 2                                   |
| S4   | Purpose or research question                | Purpose, objectives or questions stated.                                                                                        | Yes: Objective stated at end of Introduction on page 2                           |
|      | <b>Methods</b>                              |                                                                                                                                 |                                                                                  |
| S5   | Qualitative approach & research paradigm    | Specific approach and/or theory and research paradigm indicated                                                                 | Yes: Interpretivist approach, using CIS stated in Study design section on page 2 |
| S6   | Researcher characteristics and reflexivity  | Researchers' characteristics etc considered                                                                                     | Yes: Specific detail on research team in Method (study design) on page 2         |
| S7   | Context                                     | Setting/site and salient contextual factors; rationale <sup>b</sup>                                                             | Yes: page 2 (Introduction) considers the organisational context of the PCRN      |
| S8   | Sampling strategy                           | Selection of research participants, documents, etc                                                                              | Yes: In published protocol (18) and summarised in Method (page 2 and 3)          |
| S9   | Ethical issues pertaining to human subjects | Approval by review board, participant consent, etc                                                                              | No: No ethics review needed as no human participants, Stated on page 2           |
| S10  | Data collection methods                     | Type of data, process of data collection procedures, etc                                                                        | Yes: In published protocol (18) and summarised in Method page 2 and 3            |
| S11  | Data collection instruments/technologies    | Description of any materials, etc                                                                                               | No: No such instruments used                                                     |
| S12  | Units of study                              | Number/ details of participants, document, etc                                                                                  | Yes: 142 products from 22 projects. Noted in Results – Bottom page 3             |
| S13  | Data processing                             | Details regarding processing of data                                                                                            | Yes: In published protocol (18)                                                  |
| S14  | Data analysis                               | Process of theme development, refinement etc.                                                                                   | Yes: In published protocol (18) and summarised in Method (Data Analysis page 3)  |
| S15  | Techniques to enhance trustworthiness       | Checks to ensure credibility of analysis                                                                                        | Yes: In published protocol (18) and summarised in Method (Data Analysis page 3)  |
|      |                                             |                                                                                                                                 |                                                                                  |

|     |                                                          |                                                                                                                     |                                                                                      |
|-----|----------------------------------------------------------|---------------------------------------------------------------------------------------------------------------------|--------------------------------------------------------------------------------------|
|     | <b>Results/ Findings</b>                                 |                                                                                                                     |                                                                                      |
| S16 | Synthesis and interpretation                             | Main findings                                                                                                       | Yes: Themes presented as two broad topics and four key themes in Results (pages 4-5) |
| S17 | Links to empirical data                                  | Evidence presented to support findings                                                                              | Yes: Quotes presented in Table 2 and integrated into the Results (pages 4-5)         |
|     | <b>Discussion</b>                                        |                                                                                                                     |                                                                                      |
| S18 | Integration, implications, transferability, contribution | Includes summary of findings, links to existing research literature, consideration of implications and contribution | Yes: Presented in the Discussion (pages 5-7)                                         |
| S19 | Limitations                                              | Trustworthiness and limitations of findings                                                                         | Yes: Specific section on strengths and limitations (Methodological Issues page 6)    |
|     | <b>Other</b>                                             |                                                                                                                     |                                                                                      |
| S20 | Conflicts of interest                                    | Potential sources of influence or perceived influence on study conduct and conclusions; how these were managed      | Yes: Statement included on page 7                                                    |
| S21 | Funding                                                  | Sources of funding and other support; role of funders in data collection, interpretation, and reporting             | Yes: Statement included on page 7                                                    |
